# Supplementary material for: Autocrine regulation of stomatal differentiation potential by EPF1 and ERECTA-LIKE1 ligand-receptor signaling
Source: eLife. 2017 Mar 7;6:e24102. doi: 10.7554/eLife.24102 (PMC5358980; doi:10.7554/eLife.24102)
Supplement: Supplementary file 1. — List of plasmid constructs and selection markers. DOI: http://dx.doi.org/10.7554/eLife.24102.020 [file elife-24102-supp1.xlsx]

## Sheet: Sheet1
Sup File 1: List of plasmids constructed in this study
Plasmid ID	Description	Insert	Vector	Bac R	Plant R
pAR202	MUTE promoter casette	MUTE promoter	pENTR/5'-TOPO	Kan	NA
pAR205	MUTE genomic, coding region with no stop	MUTEg no stop	pKUT612	Kan	NA
pBK5	MUTEpro::ERL1-YFP	pAR202, pJSL105 (ERL1-YFP)	R4L1pGWB540	Spec/Strep	Hyg
pJSL105	ERL1 genomic, coding region with no stop	ERL1 genomic, coding	pENT/D-TOPO	Kan	NA
pJT163	MUTEpro::MUTE-tagRFP	pAR202, pAR205	R4L1pGWB659	Spec/Strep	BASTA
pLJP245	Est::MUTE	MUTEg no stop	pER8	Kan	Hyg
Note	pKUT612 -Horst et al. 2015
	pJM122 -Horst et al. 2015
	pJSL105 -Lee et al. 2012
