# Supplementary material for: Autocrine regulation of stomatal differentiation potential by EPF1 and ERECTA-LIKE1 ligand-receptor signaling
Source: eLife. 2017 Mar 7;6:e24102. doi: 10.7554/eLife.24102 (PMC5358980; doi:10.7554/eLife.24102)
Supplement: Supplementary file 2. — List of oligo DNA names, sequence, and their use. DOI: http://dx.doi.org/10.7554/eLife.24102.021 [file elife-24102-supp2.xlsx]

## Sheet: Sheet1
Sup File 2: List of primers and their DNA sequence used in this study
Gene names	Primer names	Sequences (5' to 3')	Purpose	note
ERL1	pERL1 -2319F	CCATCGTCTCAGCTTTTTGTC	ChIP qPCR	amplicon "a"
	pERL1 -2199R	AAGCCTACGAACGAGTAGCC	ChIP qPCR
	pERL1 -1569F	CAACTGACAAAACCGTAGTTGAA	ChIP qPCR	amplicon "b"
	pERL1 -1461R	TGACCACACTTGAACATTTGA	ChIP qPCR
	pERL1 -725F	TCGTCCCACTCATACAGCTT	ChIP qPCR	amplicon "c"
	pERL1 -605R	TGGTTTTCTTTTATGTTGATGTGAA	ChIP qPCR
	pERL1 -540F	CGGTGTCCCCAATCACTATC	ChIP qPCR	amplicon "d"
	pERL1 -448R	CAGGGTTAAGAGGATGGGAAG	ChIP qPCR
ACTIN2	ACTIN2 5' intergenic_F	AAAGTTTGTACGGATCGACCA	ChIP qPCR	NC1
	ACTIN2 5' intergenic_R	CGAATTTGAATATGAGCGATGA	ChIP qPCR
AGAMOUS *	pAG-F	TGAGTGATTGCCCAACTTGA	ChIP qPCR	NC2
	pAG-R	TGGTGGGTAGTTCTTGTGTGG	ChIP qPCR
ERL1	ERL1 qRT-F	TGGATCACTTTGGGACCTTC	qRT-PCR
	ERL1 qRT-R	GGCTAGTCCTTGTGCAGCTC	qRT-PCR
EPF1	EPF1+207F_qRT-PCR	ATGCCGTCTTGTGATGGTTAG	qRT-PCR
	EPF1+315rc_qRT-PCR	TCAAGGGACAGGGTAGGACTT	qRT-PCR
ACTIN2	ACTIN2 qRT-F	GATGAGGCAGGTCCAGGAATC	qRT-PCR
	ACTIN2 qRT-R	AACCCCAGCTTTTTAAGCCTTT	qRT-PCR
ERL1	ERL1 1F(GW)	CACCATGAAGGAGAAGATGCAGCG	cloning	for BK5
	ERL1 5695 rc (no stop)	GAAGGCCTTATGCTACTTTTGGAGATGACTTCAC	cloning	for BK5
MUTE	MUTE pro-5/CACC	CACCTGGTTTGGTTTTCGACCCTTGCA	cloning	for MUTEp::nucYFP
	MUTE pro-3	TCAAGATTCTCTTCTGGAGTTC	cloning	for MUTEp::nucYFP
	bHLH -1.rc	GATACTTAATTGATCAAGATTC	cloning	for AR202
	bHLH -1953	TTGCTTCAGCTGATAAGAAG	cloning	for AR202
	bHLH 1.GW	CACCATGTCTCACATCGCTGTTG	cloning	for AR205
	bHLH 1483.rc	ATTGGTAGAGACGATCAC	cloning	for AR205
	MUTE 1 EcoRI linker	CGGAATTCATGTCTCACATCGCTGTTGAA	cloning	for LJP245
	MUTE 609 BamH1.rc	CGGGATCCTTAATTGGTAGAGACGATCAC	cloning	for LJP245
	MUTE RH458	CACGATTCGCCTAGAGACAAC	qRT-PCR
	MUTE RH459	GCTGTAACTCCCCTCATGCTA	qRT-PCR
									er105
									erl1-2
									erl2-1
									epf1
									epf2
									tmm-1
									tmmKO
									mute
									spch
									ice1-2
