# Supplementary material for: Autocrine regulation of stomatal differentiation potential by EPF1 and ERECTA-LIKE1 ligand-receptor signaling
Source: eLife. 2017 Mar 7;6:e24102. doi: 10.7554/eLife.24102 (PMC5358980; doi:10.7554/eLife.24102)
Supplement: Supplementary file 3. — Numerical values of the ChIP experiments. DOI: http://dx.doi.org/10.7554/eLife.24102.022 [file elife-24102-supp3.xlsx]

## Sheet: rep1
Actin2-int_(negative control)					pAG_(negative control)
(Actin intergenic region)					(AG promoter region)
	Col	MUTE-GFP scrm-D				Col	MUTE-GFP scrm-D
rep1	0.00460102	0.0101762			rep1	0.00298834	0.00604672
rep2	0.00551374	0.0119949			rep2	0.0045026	0.00642385
rep3	0.00826851	0.0123399			rep3	0.00391882	0.0066246
average	0.00612776	0.0115037			average	0.00380325	0.00636505
SD	0.00190929	0.00116253			SD	0.000763714	0.000293392
SE	0.00110233	0.000671188			SE	0.00062357	0.000239554
pERL1-a					pERL1-b					pERL1-c					pERL1-d
	Col	MUTE-GFP scrm-D				Col	MUTE-GFP scrm-D				Col	MUTE-GFP scrm-D				Col	MUTE-GFP scrm-D
rep1	0.00500921	0.0259024			rep1	0.00459066	0.0308738			rep1	0.00417204	0.0688646			rep1	0.00617111	0.0712846
rep2	0.00532816	0.0248035			rep2	0.00596438	0.0302747			rep2	0.00489776	0.0713896			rep2	0.00535485	0.0891943
rep3	0.00633252	0.0254843			rep3	0.00623649	0.0300171			rep3	0.00481964	0.0643974			rep3	0.00627542	0.0899499
average	0.00555663	0.0253967			average	0.00559718	0.0303885			average	0.00462981	0.0682172			average	0.00593379	0.0834762
SD	0.000690607	0.000554653			SD	0.000882223	0.000439525			SD	0.000398362	0.00354076			SD	0.000504086	0.0105651
SE	0.000398722	0.000320229			SE	0.000509352	0.00025376			SE	0.000229994	0.00204426			SE	0.000291034	0.00609975
Average					SE
	Col	MUTE-GFP scrm-D			Col	MUTE-GFP scrm-D
NC1	0.00612776	0.0115037			0.00110233	0.000671188
NC2	0.00380325	0.00636505			0.00062357	0.000239554
a	0.00555663	0.0253967			0.000398722	0.000320229
b	0.00559718	0.0303885			0.000509352	0.00025376
c	0.00462981	0.0682172			0.000229994	0.00204426
d	0.00593379	0.0834762			0.000291034	0.00609975
																	0.00788944	0.135592

## Sheet: rep2
Actin2-int_(negative control)
(Actin intergenic region)
	Col	MUTE-GFP scrm-D
rep1	0.00626948	0.00516341
rep2	0.0030535	0.00718164
rep3	0.003921	0.00514631
average	0.00441466	0.00583046
SD	0.00166385	0.00117019
SE	0.000960625	0.000675612
pERL1-a				pERL1-b				pERL1-c				pERL1-d
	Col	MUTE-GFP scrm-D			Col	MUTE-GFP scrm-D			Col	MUTE-GFP scrm-D			Col	MUTE-GFP scrm-D
rep1	0.0087201	0.0139274		rep1	0.00325294	0.0105459		rep1	0.00123761	0.0150821		rep1	0.0101262	0.0310111
rep2	0.00702518	0.0111839		rep2	0.0029161	0.0108623		rep2	0.00345078	0.0208543		rep2	0.00551889	0.0266122
rep3	0.00401586			rep3	0.00318903	0.0106265		rep3	0.00652414	0.0259979		rep3	0.00628696
average	0.00658705	0.0125557		average	0.00311936	0.0106782		average	0.00373751	0.0206448		average	0.00731067	0.0288116
SD	0.00238253	0.00193991		SD	0.000178899	0.00016443		SD	0.0026549	0.00546089		SD	0.00246835	0.00311048
SE	0.00137555	0.00137172		SE	0.000103287	9.49338e-05		SE	0.00153281	0.00315285		SE	0.0014251	0.00219944
Average				SE
	Col	MUTE-GFP scrm-D		Col	MUTE-GFP scrm-D
NC1	0.00441466	0.00583046		0.000960625	0.000675612
a	0.00658705	0.0125557		0.00137555	0.00137172
b	0.00311936	0.0106782		0.000103287	9.49338e-05
c	0.00373751	0.0206448		0.00153281	0.00315285
d	0.00731067	0.0288116		0.0014251	0.00219944

## Sheet: rep3
Actin2-int_(negative control)					pAG_(negative control)
(Actin intergenic region)					(AG promoter region)
	Col	MUTE-GFP scrm-D				Col	MUTE-GFP scrm-D
rep1	0.00706525	0.0197323			rep1	0.00459166	0.0137541
rep2	0.00488696	0.021179			rep2	0.00730953	0.0105406
rep3	0.00400609	0.0224843			rep3	0.00866616	0.0127831
average	0.00531943	0.0211318			average	0.00685579	0.0123593
SD	0.00157476	0.00137659			SD	0.0020748	0.00164812
SE	0.000909191	0.000794777			SE	0.00119789	0.000951542
pERL1-a				pERL1-b				pERL1-c				pERL1-d
	Col	MUTE-GFP scrm-D			Col	MUTE-GFP scrm-D			Col	MUTE-GFP scrm-D			Col	MUTE-GFP scrm-D
rep1	0.0124368	0.0288108		rep1	0.00757192	0.041156		rep1	0.0143653	0.0552804		rep1	0.0115644	0.0674781
rep2	0.0116756	0.0330067		rep2	0.0078098	0.0444235		rep2	0.0113966	0.0635792		rep2	0.0195329	0.0919259
rep3	0.0124441	0.0318971		rep3	0.0122471	0.0353435		rep3	0.011191	0.064284		rep3	0.0116568	0.0767282
average	0.0121855	0.0312382		average	0.00920961	0.0403077		average	0.0123176	0.0610479		average	0.0142514	0.0787107
SD	0.000441579	0.00217419		SD	0.00263324	0.00459904		SD	0.00177629	0.00500723		SD	0.00457414	0.0123439
SE	0.000254946	0.00125527		SE	0.0015203	0.00265525		SE	0.00102554	0.00289092		SE	0.00264088	0.00712674
Average					SE
	Col	MUTE-GFP scrm-D				Col	MUTE-GFP scrm-D
NC1	0.00531943	0.0211318			NC1	0.000909191	0.000794777
NC2	0.00685579	0.0123593			NC2	0.000254946	0.00125527
a	0.0121855	0.0312382			a	0.000254946	0.00125527
b	0.00920961	0.0403077			b	0.0015203	0.00265525
c	0.0123176	0.0610479			c	0.00102554	0.00289092
d	0.0142514	0.0787107			d	0.00264088	0.00712674
